# Supplementary material
Source: PubMed Central journal article supplement (PMC7507115)
Supplement: sb0c00308_si_001.pdf [file sb0c00308_si_001.pdf]

# Supporting Information

## **Synthesis and Characterization of Heterodimers and Fluorescent Nisin Species by Incorporation of Methionine Analogues and Subsequent Click Chemistry**

**Jingjing Deng, Jakob H. Viel, Jingqi Chen and Oscar P. Kuipers\***

Department of Molecular Genetics, University of Groningen, Nijenborgh 7, 9747 AG  
Groningen, The Netherlands.

\* Corresponding author: Email: [o.p.kuipers@rug.nl](mailto:o.p.kuipers@rug.nl)

## Supplementary Figures

**A**



**B**

| Peptides                            | Predicted mass (Da) | Measured Mass (Da) |
|-------------------------------------|---------------------|--------------------|
| Nisin                               | 3353.03             | 3353.39            |
| M17I-M21Aha + M17I-M21Hpg           | 6644.97             | 6644.74            |
| M21V-M17Aha + M21V-M17Hpg           | 6616.93             | 6615.19            |
| M17I-M21V-M35Aha + M17I-M21V-M35Hpg | 6843.23             | 6842.99            |
| M21V-M17Aha + M17I-M21Hpg           | 6630.95             | 6629.77            |
| M17I-M21Aha + M17I-M21V-M35Hpg      | 6744.10             | 6743.84            |
| M17I-M21V-M35Aha + M21V-M17Hpg      | 6730.08             | 6729.22            |
| M17I-M21Hpg + Nisin ABC-azide       | 5276.39             | 5275.12            |
| M21V-M17Hpg + Nisin ABC-azide       | 5262.37             | 5261.65            |
| M17I-M21V-M35Hpg + Nisin ABC-azide  | 5375.52             | 5374.89            |

Supplementary Figure 1. A). MALDI-TOF analysis of nisin, dimeric nisin constructs and nisin hybrids. B). Predicted and measured mass of nisin, dimeric nisin constructs and nisin hybrids.

**A****B**

| Peptides                        | Predicted mass (Da) | Measured Mass (Da) |
|---------------------------------|---------------------|--------------------|
| M17I-M21Aha + 6-FAM-alkyne      | 3744.36             | 3744.63            |
| M21V-M17Aha + 6-FAM-alkyne      | 3730.34             | 3730.05            |
| M17I-M21V-M35Aha + 6-FAM-alkyne | 3843.49             | 3843.27            |
| M17I-M21Hpg + Cy5-azide         | 3879.36             | 3879.30            |
| M21V-M17Hpg + Cy5-azide         | 3865.34             | 3865.37            |
| M17I-M21V-M35Hpg + Cy5-azide    | 3978.49             | 3978.28            |

Supplementary Figure 2. A). MALDI-TOF analysis of fluorescently labeled nisin variants. B). Predicted and measured mass of fluorescently-labeled nisin variants.

## Supplementary Tables

Supplementary Table 1. Strains and plasmids used in this study.

| Strains or Plasmids                     | Characteristics                                                                                                | References                                               |
|-----------------------------------------|----------------------------------------------------------------------------------------------------------------|----------------------------------------------------------|
| <b>Strains</b>                          |                                                                                                                |                                                          |
| <i>Lactococcus lactis</i><br>NZ9000     | <i>pepN::nisRK</i> ; Expression host strain                                                                    | 1                                                        |
| <b>Indicator strains</b>                |                                                                                                                |                                                          |
| <i>Micrococcus flavus</i>               |                                                                                                                | Lab collection                                           |
| <i>Staphylococcus aureus</i> CAL        | Methicillin resistant (MRSA)                                                                                   | The University Medical Center Groningen, The Netherlands |
| <i>Staphylococcus aureus</i> MW2        | Methicillin resistant (MRSA)                                                                                   | The University Medical Center Groningen, The Netherlands |
| <i>Enterococcus faecium</i> LMG 16003   | Avoparcin and vancomycin resistant (VRE)                                                                       | Laboratory of Microbiology, Gent, Belgium                |
| <i>Enterococcus faecalis</i> LMG 16216  | Vancomycin resistant (VRE)                                                                                     | Laboratory of Microbiology, Gent, Belgium                |
| <i>Bacillus cereus</i> ATCC 14579       |                                                                                                                | 2                                                        |
| <i>Listeria monocytogenes</i> LMG 10470 |                                                                                                                | 3                                                        |
| <b>Plasmids</b>                         |                                                                                                                |                                                          |
| pIL3EryBTC                              | EryR, <i>nisBTC</i> , modification and transport of lantibiotics                                               | 4                                                        |
| pCZ-nisA                                | CmR, <i>nisA</i> , encoding NisA, under the control of PczcD promoter                                          | 5                                                        |
| pCZ-nisA-M17I                           | Point mutant of pCZ-nisA, with the Met 17 of nisin changed to Ile                                              | This work                                                |
| pCZ-nisA-M21V                           | Point mutant of pCZ-nisA, with the Met 21 of nisin changed to Val                                              | This work                                                |
| pCZ-nisA-M17I-M21V-M35                  | Point mutant of pCZ-nisA, with the Met 17 and 21 of nisin changed to Ile and Val, respectively, with Met 35    | This work                                                |
| pCZ-nisA-I4M-M17I-M21V                  | Point mutant of pCZ-nisA, with the Ile 4, Met 17 and Met 21 of nisin changed to Met, Ile and Val, respectively | This work                                                |
| pNZnisP8H                               | CmR, <i>nisP</i> , encoding NisP mutant, with 8 histines                                                       | 6                                                        |

Supplementary Table 2. Primers used in this study

| Mutants               | Primer   | Sequence                                                |
|-----------------------|----------|---------------------------------------------------------|
| M17I                  | pCZ-F    | aacagtagtggcctcgtagc                                    |
|                       | M17I-Rev | gctgttttcatgttacaaccaatcagagctcctgttttac                |
|                       | M17I-Fwd | gtaaaacaggagctctgattggtgtaacatgaaaacagc                 |
|                       | pCZ-R    | tagtctcggacattctgctc                                    |
| M21V                  | pCZ-F    | aacagtagtggcctcgtagc                                    |
|                       | M21V-Rev | tacaatgacaagttgctgttttacgttacaacccatcagagctc            |
|                       | M21V-Fwd | agctctgatgggtgtaacgtaaaaacagcaactgtcattgtag             |
|                       | pCZ-R    | tagtctcggacattctgctc                                    |
| M17I-<br>M21V-<br>M35 | NheI-For | atcagctagcacggaatagacatggtgttc                          |
|                       | M35-Rev1 | ctacaatgacaagttgctgttttacgttacaaccaatcagagctcctgttttac  |
|                       | M35-Rev2 | taccgatgcctgcaggcttacatttgcttacgtgaatactacaatgacaagttg  |
| I4M-<br>M17I-<br>M21V | NheI-For | atcagctagcacggaatagacatggtgttc                          |
|                       | I4-Rev1  | cagagctcctgttttacaaccgggtgtacatagcgacatacttgaatgctgggtg |
|                       | I4-Rev2  | acaatgacaagttgctgttttacgttacaaccaatcagagctcctgttttac    |
|                       | I4-Rev3  | taccgatgcctgcaggcttatttgcttacgtgaatactacaatgacaagttgctg |

## References

- (1) Kuipers, O. P., de Ruyter, P. G. G. A., Kleerebezem, M. and de Vos, W. M. (1997) Controlled overproduction of proteins by lactic acid bacteria. *Trends biotechnol.* 15, 135-140.
- (2) Ivanova, N., Sorokin, A., Anderson, I., Galleron, N., Candelon, B., Kapatral, V., Bhattacharyya, A., Reznik, G., Mikhailova, N., Lapidus, A., Chu, L., Mazur, M., Goltsman, E., Larsen, N., D'Souza, M., Walunas, T., Grechkin, Y., Pusch, G., Haselkorn, R., Fonstein, M., Ehrlich, S. D., Overbeek, R. and Kyrpides, N. (2003) Genome sequence of *Bacillus cereus* and comparative analysis with *Bacillus anthracis*. *Nature* 423, 87-91.
- (3) Enan, G. (2006) Control of the regrowing bacteriocin resistant variants of *Listeria monocytogenes* LMG 10470 *in vitro* and in food by nisinplantaricin UG1 mixture. *Biotechnology* 5, 143-147.
- (4) van Heel, A. J., Mu, D., Montalban-Lopez, M., Hendriks, D., and Kuipers, O. P. (2013) Designing and producing modified, new-to-nature peptides with antimicrobial activity by use of a combination of various lantibiotic modification enzymes. *ACS synth. biol.* 2, 397-404.
- (5) Mu, D., Montalban-Lopez, M., Masuda, Y., and Kuipers, O. P. (2013) Zirex: a novel zinc-regulated expression system for *Lactococcus lactis*. *Appl. Environ. Microbiol.* 79, 4503-4508.
- (6) Montalban-Lopez, M., Deng, J., van Heel, A. J., and Kuipers, O. P. (2018) Specificity and application of the lantibiotic protease NisP. *Front. Microbiol.* 9, 160.
